# Supplementary material for: The Cocrystal of Ubiquinol: Improved Stability and Bioavailability
Source: MDPI journal article supplement (doi:10.3390/pharmaceutics15102499), 2023-10-20
Supplement: s1 [file s1]

# Supplementary Materials

## Cocrystal of ubiquinol: improved stability and bioavailability

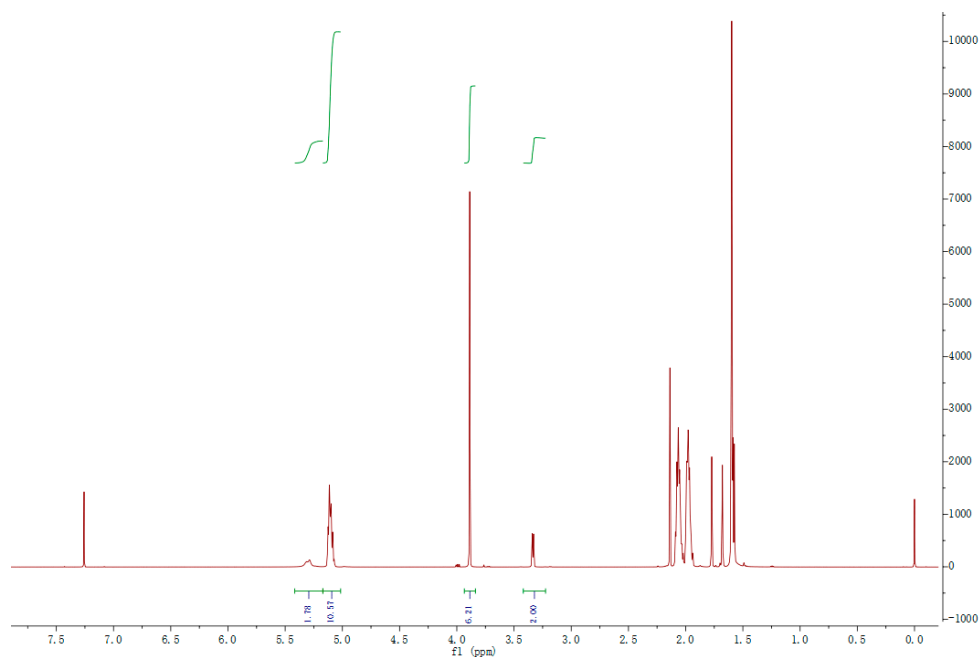

Figure S1.  $^1\text{H}$  NMR spectra of ubiquinol.

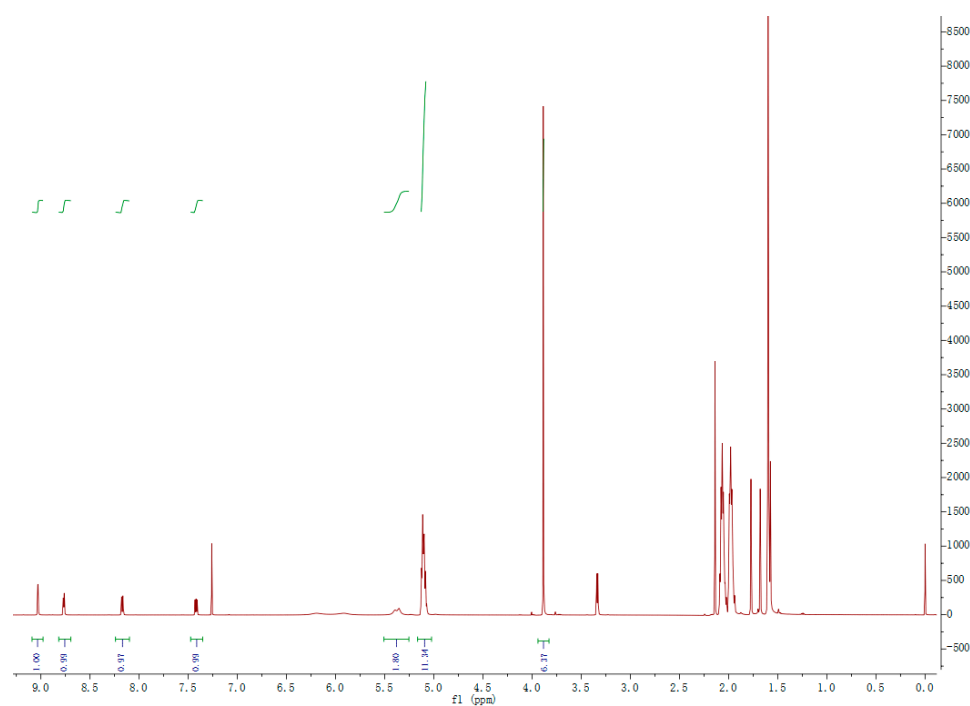

Figure S2.  $^1\text{H}$  NMR spectra of UQ-NC cocrystal.

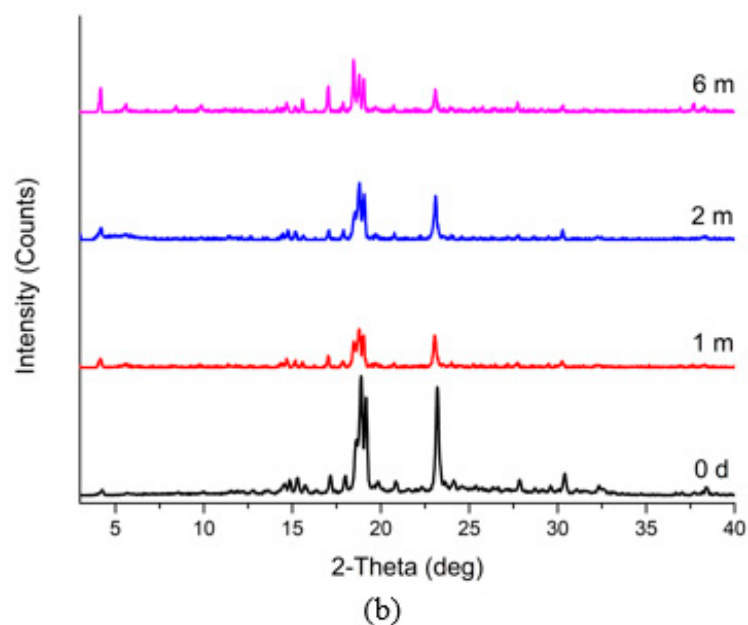

FigureS3. XRPD pattern of UQ-NC cocrystal during storage at 40°C/75% RH.

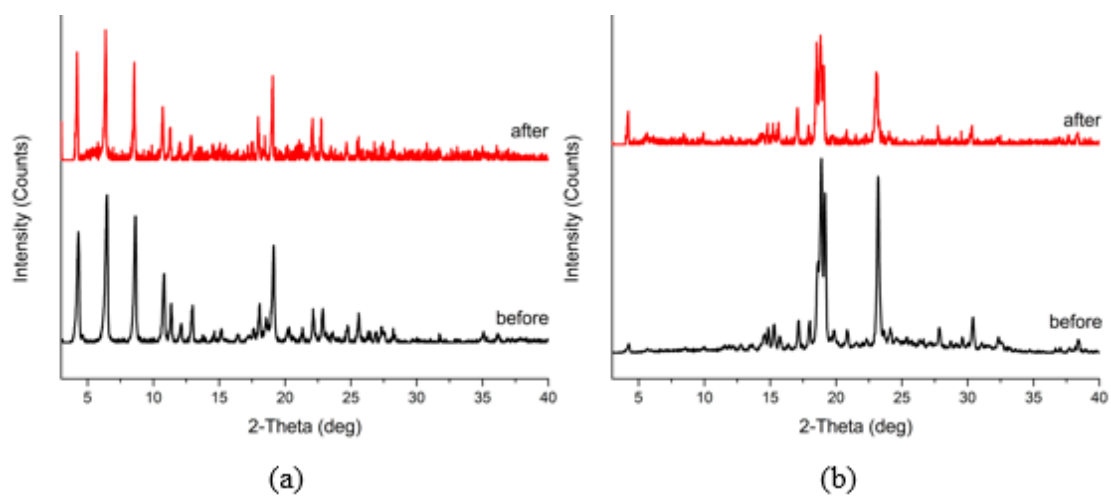

Figure S4. XRPD patterns before and after dissolution test (SGF) (a) ubiquinol (b) UQ-NC cocrystal.

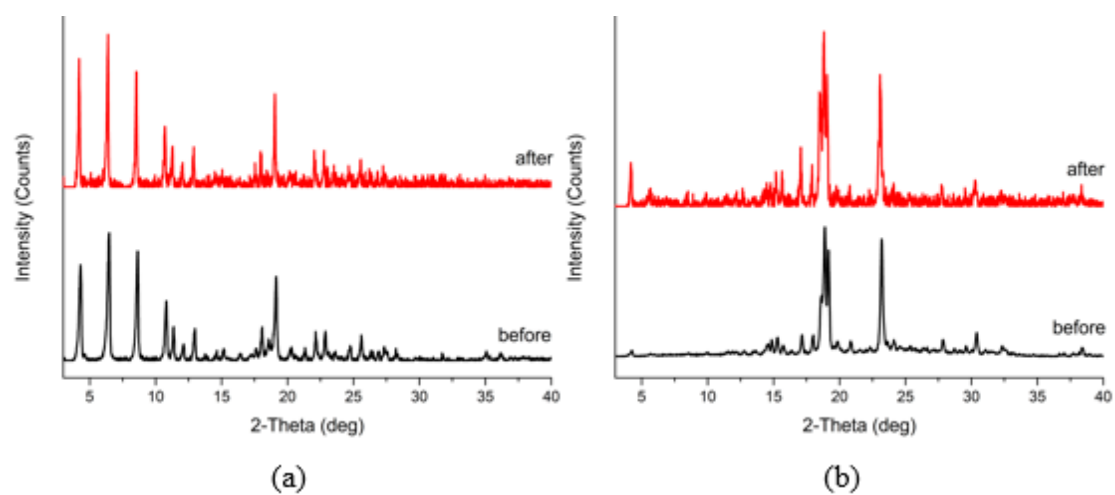

Figure S5. XRPD patterns before and after dissolution test (SIF) (a) ubiquinol (b) UQ-NC cocrystal
